# Supplementary material
Source: PubMed Central journal article supplement (PMC4325789)
Supplement: AAC.04642-14_zac003153744so1.pdf [file AAC.04642-14_zac003153744so1.pdf]

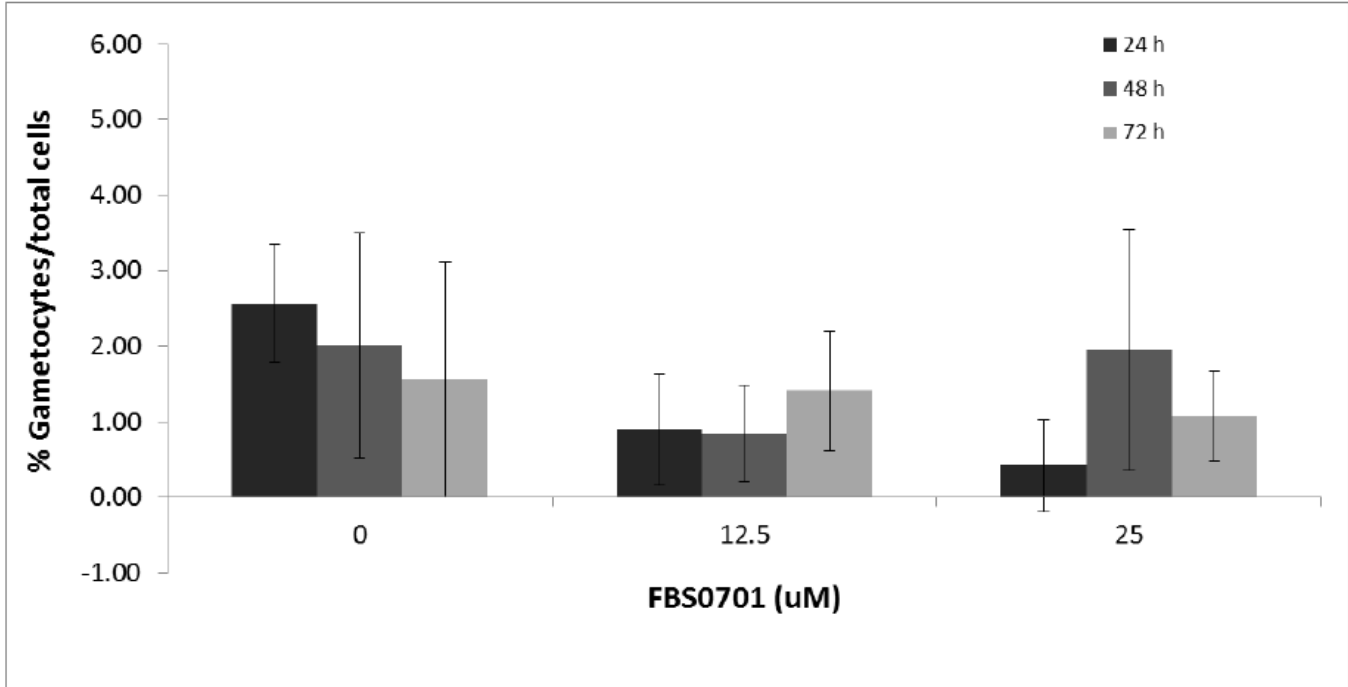

**Figure S1:** Percent of gametocytes present before membrane feeding. Smears were made from each FBS0701 treated culture and gametocytes were counted by light microscopy after staining with Giemsa. Error bars represent the standard error of the mean.

**Table S1: Effect of incubation of *P. falciparum* mature gametocytes with FBS on mosquito stage development.**

| Experiment | Treatment | Period (hrs) | [ $\mu$ M] | N <sup>a</sup> | Prevalence <sup>b</sup> | % reduction of prevalence <sup>c</sup> | Mean oocyst # (Range) | Median | % inhibition (median) <sup>d</sup> | P-value <sup>e</sup> |
|------------|-----------|--------------|------------|----------------|-------------------------|----------------------------------------|-----------------------|--------|------------------------------------|----------------------|
| 1          | Blank     | 24           | 0          | 35             | 97                      | -                                      | 91 (0-302)            | 91     | -                                  | -                    |
|            | FBS       | 24           | 12.5       | 29             | 100                     | <b>0</b>                               | 85 (23-204)           | 81     | <b>11</b>                          | NS                   |
|            | FBS       | 24           | 25         | 40             | 88                      | <b>10</b>                              | 18 (0-48)             | 18     | <b>81</b>                          | <0.001               |
|            | Blank     | 48           | 0          | 35             | 94                      | -                                      | 42 (0-129)            | 32     | -                                  | -                    |
|            | FBS       | 48           | 12.5       | 32             | 88                      | <b>7</b>                               | 16 (0-50)             | 17     | <b>48</b>                          | <0.001               |
|            | FBS       | 48           | 25         | 28             | 11                      | <b>89</b>                              | 0.11 (0-1)            | 0      | <b>100</b>                         | <0.001               |
|            | Blank     | 72           | 0          | 30             | 63                      | -                                      | 35 (0-116)            | 34     | -                                  | -                    |
|            | FBS       | 72           | 12.5       | 27             | 15                      | <b>77</b>                              | 0.19 (0-2)            | 0      | <b>100</b>                         | <0.001               |
|            | FBS       | 72           | 25         | 18             | 0                       | <b>100</b>                             | 0 (0)                 | 0      | <b>100</b>                         | <0.001               |
| 2          | Blank     | 24           | 0          | 45             | 93                      | -                                      | 35 (0-116)            | 18     | -                                  | -                    |
|            | FBS       | 24           | 25         | 48             | 52                      | <b>44</b>                              | 1 (0-9)               | 1      | <b>94</b>                          | <0.001               |
|            | FBS       | 24           | 50         | 45             | 27                      | <b>71</b>                              | 1 (0-9)               | 0      | <b>100</b>                         | <0.001               |
|            | Blank     | 48           | 0          | 40             | 88                      | -                                      | 32 (0-107)            | 16     | -                                  | -                    |
|            | FBS       | 48           | 25         | 41             | 17                      | <b>81</b>                              | 0.17 (0-1)            | 0      | <b>100</b>                         | <0.001               |
|            | FBS       | 48           | 50         | 45             | 7                       | <b>92</b>                              | 0.07 (0-1)            | 0      | <b>100</b>                         | <0.001               |
|            | Blank     | 72           | 0          | 39             | 62                      | -                                      | 10 (0-56)             | 2      | -                                  | -                    |
|            | FBS       | 72           | 25         | 42             | 5                       | <b>92</b>                              | 0.07 (0-2)            | 0      | <b>100</b>                         | <0.001               |
|            | FBS       | 72           | 50         | 37             | 5                       | <b>91</b>                              | 0.05 (0-1)            | 0      | <b>100</b>                         | <0.001               |
| 3          | Blank     | 48           | 0          | 39             | 80                      | -                                      | 48 (0-172)            | 35     | -                                  | -                    |
|            | FBS       | 48           | 12.5       | 40             | 83                      | <b>0</b>                               | 23 (0-60)             | 23     | <b>34</b>                          | <0.001               |
|            | FBS       | 48           | 25         | 49             | 8                       | <b>90</b>                              | 0.14 (0-4)            | 0      | <b>100</b>                         | <0.001               |
|            | Blank     | 72           | 0          | 38             | 76                      | -                                      | 29 (0-104)            | 24     | -                                  | -                    |
|            | FBS       | 72           | 12.5       | 43             | 44                      | <b>42</b>                              | 1 (0-10)              | 0      | <b>100</b>                         | <0.001               |
| 4          | Blank     | 24           | 0          | 29             | 62                      | -                                      | 3 (0-16)              | 1      | -                                  | -                    |
|            | FBS       | 24           | 25         | 32             | 9                       | <b>85</b>                              | 0.13 (0-2)            | 0      | <b>100</b>                         | <0.001               |
|            | FBS       | 24           | 50         | 28             | 11                      | <b>83</b>                              | 0.11 (0-1)            | 0      | <b>100</b>                         | <0.001               |

<sup>a</sup> N = number of mosquitoes

<sup>b</sup> Prevalence = Percentage of infected mosquitoes

<sup>c</sup> Percentage reduction of prevalence = ([prevalence for control mosquitoes - prevalence for experimental mosquitoes] / prevalence for control mosquitoes) X 100

<sup>d</sup> Percentage inhibition = ([median oocyst # for control mosquitoes - median oocyst # for experimental mosquitoes] / median oocyst # for control mosquitoes) X 100

<sup>e</sup> Statistical significance was determined by Mann Whitney U Test,  $\alpha = 0.05$ . NS = not significant.

**Table S2: Effect of incubation of *P. falciparum* mature gametocytes with DFO on mosquito stage development.**

| Experiment | Treatment | Period (hrs) | [ $\mu$ M] | N <sup>a</sup> | Prevalence <sup>b</sup> | % reduction of prevalence <sup>c</sup> | Mean oocyst # (Range) | Median | % inhibition (median) <sup>d</sup> | P-value <sup>e</sup> |
|------------|-----------|--------------|------------|----------------|-------------------------|----------------------------------------|-----------------------|--------|------------------------------------|----------------------|
| 1          | Blank     | 24           | 0          | 52             | 75                      | -                                      | 25 (0-115)            | 10     | -                                  | -                    |
|            | DFO       | 24           | 12.5       | 45             | 71                      | 5                                      | 18 (0-90)             | 3      | 68                                 | NS                   |
|            | DFO       | 24           | 25         | 38             | 78                      | 0                                      | 18 (0-93)             | 3      | 74                                 | NS                   |
|            | Blank     | 48           | 0          | 43             | 54                      | -                                      | 24 (0-124)            | 1      | -                                  | -                    |
|            | DFO       | 48           | 12.5       | 39             | 62                      | 0                                      | 23 (0-89)             | 1      | 0                                  | NS                   |
|            | DFO       | 48           | 25         | 50             | 42                      | 22                                     | 13 (0-98)             | 0      | 100                                | NS                   |
|            | Blank     | 72           | 0          | 43             | 56                      | -                                      | 26 (0-112)            | 1      | -                                  | -                    |
|            | DFO       | 72           | 12.5       | 45             | 56                      | 0                                      | 21 (0-122)            | 1      | 0                                  | NS                   |
|            | DFO       | 72           | 25         | 39             | 49                      | 13                                     | 11 (0-45)             | 0      | 100                                | NS                   |
| 2          | Blank     | 24           | 0          | 37             | 78                      | -                                      | 14 (0-66)             | 7      | -                                  | -                    |
|            | DFO       | 24           | 12.5       | 45             | 87                      | 0                                      | 9 (0-62)              | 5      | 29                                 | NS                   |
|            | DFO       | 24           | 25         | 45             | 83                      | 0                                      | 14 (0-34)             | 11     | 0                                  | NS                   |
|            | Blank     | 48           | 0          | 50             | 92                      | -                                      | 8 (0-31)              | 6      | -                                  | -                    |
|            | DFO       | 48           | 12.5       | 46             | 74                      | 20                                     | 8 (0-37)              | 5      | 17                                 | NS                   |
|            | DFO       | 48           | 25         | 32             | 66                      | 29                                     | 3 (0-18)              | 2      | 67                                 | < 0.05               |
|            | Blank     | 72           | 0          | 32             | 81                      | -                                      | 9 (0-31)              | 4      | -                                  | -                    |
|            | DFO       | 72           | 12.5       | 37             | 60                      | 27                                     | 3 (0-16)              | 1      | 75                                 | < 0.001              |
|            | DFO       | 72           | 25         | 42             | 28                      | 66                                     | 0.72 (0-6)            | 0      | 100                                | < 0.001              |
| 3          | Blank     | 24           | 0          | 22             | 91                      | -                                      | 19 (0-90)             | 11     | -                                  | -                    |
|            | DFO       | 24           | 12.5       | 23             | 96                      | 0                                      | 24 (0-62)             | 21     | 0                                  | NS                   |
|            | DFO       | 24           | 25         | 23             | 83                      | 9                                      | 25 (0-97)             | 16     | 0                                  | NS                   |
|            | Blank     | 48           | 0          | 27             | 85                      | -                                      | 16 (0-53)             | 11     | -                                  | -                    |
|            | DFO       | 48           | 12.5       | 26             | 73                      | 14                                     | 16 (0-61)             | 14     | 0                                  | NS                   |
|            | DFO       | 48           | 25         | 24             | 75                      | 12                                     | 14 (0-55)             | 6      | 45                                 | NS                   |

<sup>a</sup> N = number of mosquitoes

<sup>b</sup> Prevalence = Percentage of infected mosquitoes

<sup>c</sup> Percentage reduction of prevalence = ([prevalence for control mosquitoes - prevalence for experimental mosquitoes] / prevalence for control mosquitoes) X 100

<sup>d</sup> Percentage inhibition = ([median oocyst # for control mosquitoes - median oocyst # for experimental mosquitoes] / median oocyst # for control mosquitoes) X 100

<sup>e</sup> Statistical significance was determined by Mann Whitney U Test,  $\alpha = 0.05$ . NS = not significant.

**Table S3: Effect of incubation of *P. falciparum* mature gametocytes with FBS and Fe on mosquito stage development.**

| Experiment | Treatment | Period (hrs) | [ $\mu$ M] | N <sup>a</sup> | Prevalence <sup>b</sup> | % reduction of prevalence <sup>c</sup> | Mean oocyst # (Range) | Median | % inhibition (median) <sup>d</sup> | P-value <sup>e</sup> |
|------------|-----------|--------------|------------|----------------|-------------------------|----------------------------------------|-----------------------|--------|------------------------------------|----------------------|
| 1          | Blank     | 24           | 0/0        | 41             | 88                      | -                                      | 35 (0-127)            | 39     | -                                  | -                    |
|            | FBS/Fe    | 24           | 25/12.5    | 37             | 97                      | 0                                      | 58 (0-115)            | 55     | 0                                  | < 0.01               |
|            | FBS/Fe    | 24           | 25/25      | 48             | 97                      | 0                                      | 44 (0-131)            | 43     | 0                                  | < 0.05               |
|            | FBS/Fe    | 24           | 25/50      | 55             | 98                      | 0                                      | 40 (0-102)            | 43     | 0                                  | NS                   |
|            | Fe        | 24           | 0/12.5     | 40             | 98                      | 0                                      | 38 (0-120)            | 30     | 24                                 | NS                   |
|            | Fe        | 24           | 0/25       | 39             | 92                      | 0                                      | 21 (0-65)             | 17     | 56                                 | NS                   |
|            | Fe        | 24           | 0/50       | 40             | 85                      | 3                                      | 18 (0-70)             | 12     | 69                                 | NS                   |
| 2          | Blank     | 24           | 0/0        | 67             | 93                      | -                                      | 14 (0-36)             | 14     | -                                  | -                    |
|            | FBS       | 24           | 25/0       | 57             | 12                      | 87                                     | 0.16 (0-3)            | 0      | 99                                 | < 0.001              |
|            | FBS/Fe    | 24           | 25/12.5    | 54             | 89                      | 4                                      | 17 (0-53)             | 16     | 0                                  | NS                   |
|            | FBS/Fe    | 24           | 25/25      | 61             | 95                      | 0                                      | 26 (0-68)             | 26     | 0                                  | < 0.001              |
|            | FBS/Fe    | 24           | 25/50      | 65             | 97                      | 0                                      | 19 (0-92)             | 16     | 0                                  | NS                   |
|            | Fe        | 24           | 0/12.5     | 52             | 85                      | 9                                      | 11 (0-49)             | 8      | 46                                 | NS                   |
|            | Fe        | 24           | 0/25       | 39             | 97                      | 0                                      | 12 (0-28)             | 11     | 21                                 | NS                   |
| Fe         | 24        | 0/50         | 42         | 93             | 0                       | 12 (0-41)                              | 9                     | 36     | NS                                 |                      |
| 3          | Blank     | 24           | 0/0        | 43             | 88                      | -                                      | 55 (0-197)            | 48     | -                                  | -                    |
|            | FBS       | 24           | 25/0       | 39             | 74                      | 16                                     | 9 (0-29)              | 8      | 83                                 | < 0.01               |
|            | FBS/Fe    | 24           | 25/12.5    | 42             | 83                      | 6                                      | 56 (0-241)            | 41     | 0                                  | NS                   |
|            | FBS/Fe    | 24           | 25/25      | 43             | 86                      | 3                                      | 65 (0-283)            | 51     | 0                                  | NS                   |
|            | FBS/Fe    | 24           | 25/50      | 39             | 80                      | 10                                     | 72 (0-227)            | 60     | 0                                  | NS                   |
|            | Fe        | 24           | 0/12.5     | 33             | 85                      | 4                                      | 24 (0-118)            | 16     | 67                                 | NS                   |
|            | Fe        | 24           | 0/25       | 39             | 85                      | 4                                      | 31 (0-161)            | 22     | 54                                 | NS                   |
| Fe         | 24        | 0/50         | 33         | 85             | 4                       | 46 (0-176)                             | 40                    | 17     | NS                                 |                      |

<sup>a</sup> N = number of mosquitoes

<sup>b</sup> Prevalence = Percentage of infected mosquitoes

<sup>c</sup> Percentage reduction of prevalence = ([prevalence for control mosquitoes - prevalence for experimental mosquitoes] / prevalence for control mosquitoes) X 100

<sup>d</sup> Percentage inhibition = ([median oocyst # for control mosquitoes - median oocyst # for experimental mosquitoes] / median oocyst # for control mosquitoes) X 100

<sup>e</sup> Statistical significance was determined by Mann Whitney U Test,  $\alpha = 0.05$ . NS = not significant.

**Table S4: Effect of FBS on *P. falciparum* sexual reproduction inside the mosquito midgut.**

| Experiment | Treatment | [ $\mu$ M] | N <sup>a</sup> | Prevalence <sup>b</sup> | reduction of prevalence <sup>c</sup> | Mean oocyst # (Range) | Median | Inhibition (median) <sup>d</sup> | P-value <sup>e</sup> |
|------------|-----------|------------|----------------|-------------------------|--------------------------------------|-----------------------|--------|----------------------------------|----------------------|
| 1          | Blank     | 0          | 38             | 92.1                    | -                                    | 35 (0-152)            | 18     | -                                | -                    |
|            | FBS       | 3.38       | 37             | 100                     | 0                                    | 31 (0-116)            | 23     | 0                                | NS                   |
|            | FBS       | 6.75       | 39             | 87.2                    | 5                                    | 25 (0-139)            | 14     | 22                               | NS                   |
|            | FBS       | 12.5       | 42             | 97.6                    | 0                                    | 27 (0-149)            | 19     | 0                                | NS                   |
|            | FBS       | 25         | 44             | 93.2                    | 0                                    | 27 (0-117)            | 19     | 0                                | NS                   |
|            | FBS       | 50         | 43             | 76.7                    | 17                                   | 17 (0-69)             | 7      | 61                               | NS                   |
|            | FBS       | 100        | 37             | 94.6                    | 0                                    | 22 (0-116)            | 14     | 22                               | NS                   |
| 2          | Blank     | 0          | 13             | 100                     | -                                    | 73 (8-207)            | 63     | -                                | -                    |
|            | FBS       | 12.5       | 10             | 100                     | 0                                    | 88 (25-192)           | 92     | 0                                | NS                   |
|            | FBS       | 25         | 9              | 100                     | 0                                    | 54 (11-95)            | 53     | 16                               | NS                   |
|            | FBS       | 50         | 25             | 92                      | 8                                    | 42 (0-90)             | 43     | 32                               | NS                   |
|            | FBS       | 100        | 25             | 96                      | 4                                    | 47 (0-95)             | 37     | 41                               | NS                   |

<sup>a</sup> N = number of mosquitoes

<sup>b</sup> Prevalence = Percentage of infected mosquitoes

<sup>c</sup> Percentage reduction of prevalence =  $([\text{prevalence for control mosquitoes} - \text{prevalence for experimental mosquitoes}] / \text{prevalence for control mosquitoes}) \times 100$

<sup>d</sup> Percentage inhibition =  $([\text{median oocyst \# for control mosquitoes} - \text{median oocyst \# for experimental mosquitoes}] / \text{median oocyst \# for control mosquitoes}) \times 100$

<sup>e</sup> Statistical significance was determined by Mann Whitney U Test,  $\alpha = 0.05$ . NS = not significant.
